# Supplementary material for: Development and application of coupled system dynamics and game theory: A dynamic water conflict resolution method
Source: PLoS One. 2017 Dec 7;12(12):e0188489. doi: 10.1371/journal.pone.0188489 (PMC5720790; doi:10.1371/journal.pone.0188489)
Supplement: S4 Table — (XLSX) [file pone.0188489.s004.xlsx]

## Sheet: Inside Basin
Year	Season	Ratio	Current Utility	Population Growth Rate	Population	Total Water Demand per Capita (lit/day)	Domestic Water Demand per Capita (lit/day)	Total Water Demand (MCM)	Domestic Water Demand (MCM)	Non-Domestic Water Demand (MCM)	Total Water Supply (MCM)	Unmet Demand (MCM)
1992	1	1.0499	1	5.032	338235	404.721	214.138	12.32	6.52	3.19	12.93	0
1992	2	1.0458	1	5.032	342490	404.721	214.138	12.61	6.67	3.27	13.19	0
1992	3	1.0135	1	5.032	346799	404.721	214.138	12.91	6.83	3.35	13.09	0
1992	4	1.0499	1	5.032	351162	404.721	214.138	13.08	6.92	3.39	13.73	0
1993	1	1.0003	1	5.059	355603	412.415	218.209	13.2	6.98	3.42	13.2	0
1993	2	1.0499	1	5.059	360100	412.415	218.209	13.51	7.15	3.5	14.19	0
1993	3	1.05	1	5.059	364654	412.415	218.209	13.84	7.32	3.59	14.53	0
1993	4	1.0265	1	5.059	369266	412.415	218.209	14.01	7.41	3.63	14.38	0
1994	1	1.0467	1	5.084	373959	419.514	221.965	14.12	7.47	3.66	14.78	0
1994	2	1.0132	1	5.084	378712	419.514	221.965	14.46	7.65	3.75	14.65	0
1994	3	1.0499	1	5.084	383525	419.514	221.965	14.8	7.83	3.84	15.54	0
1994	4	1.05	1	5.084	388400	419.514	221.965	14.99	7.93	3.89	15.74	0
1995	1	1.0366	1	5.111	393363	427.329	226.1	15.13	8	3.92	15.68	0
1995	2	1.0321	1	5.111	398389	427.329	226.1	15.49	8.2	4.02	15.99	0
1995	3	1.05	1	5.111	403479	427.329	226.1	15.86	8.39	4.11	16.66	0
1995	4	1.05	1	5.111	408634	427.329	226.1	16.07	8.5	4.17	16.87	0
1996	1	1.0032	1	5.138	413883	435.407	230.374	16.22	8.58	4.2	16.27	0
1996	2	1.0462	1	5.138	419199	435.407	230.374	16.61	8.79	4.31	17.38	0
1996	3	1.0095	1	5.138	424584	435.407	230.374	17.01	9	4.41	17.17	0
1996	4	1.0227	1	5.138	430038	435.407	230.374	17.23	9.11	4.47	17.62	0
1997	1	1.05	1	5.156	435581	440.697	233.173	17.28	9.14	4.48	18.14	0
1997	2	1.0268	1	5.156	441196	440.697	233.173	17.69	9.36	4.59	18.17	0
1997	3	1.05	1	5.156	446883	440.697	233.173	18.12	9.59	4.7	19.02	0
1997	4	1.0375	1	5.156	452643	440.697	233.173	18.35	9.71	4.76	19.04	0
1998	1	1.0499	1	5.116	458432	428.926	226.945	17.7	9.36	4.59	18.58	0
1998	2	1.0458	1	5.116	464295	428.926	226.945	18.12	9.59	4.7	18.95	0
1998	3	1.0347	1	5.116	470233	428.926	226.945	18.56	9.82	4.81	19.2	0
1998	4	1.0142	1	5.116	476247	428.926	226.945	18.79	9.94	4.87	19.06	0
1999	1	1.05	1	5.13	482355	433.044	229.124	18.8	9.95	4.87	19.74	0
1999	2	1.0108	1	5.13	488541	433.044	229.124	19.25	10.19	4.99	19.46	0
1999	3	0.96	0.998	5.13	494807	433.044	229.124	19.71	10.43	5.11	18.92	0.79
1999	4	1.05	1	5.091	501105	432.343	228.753	19.93	10.55	5.17	20.93	0
2000	1	1.0174	1	5.155	507563	440.294	232.96	20.11	10.64	5.21	20.46	0
2000	2	1.0155	1	5.155	514104	440.294	232.96	20.6	10.9	5.34	20.92	0
2000	3	1.05	1	5.155	520730	440.294	232.96	21.09	11.16	5.47	22.15	0
2000	4	1.05	1	5.155	527441	440.294	232.96	21.37	11.3	5.54	22.43	0
2001	1	1.0215	1	5.148	534229	438.403	231.959	21.08	11.15	5.46	21.53	0
2001	2	0.9245	0.995	5.148	541105	438.403	231.959	21.59	11.42	5.6	19.96	1.63
2001	3	0.8719	0.986	5.049	547935	436.624	231.018	22.01	11.65	5.71	19.19	2.82
2001	4	0.7492	0.947	4.875	554613	433.42	229.323	22.12	11.7	5.73	16.57	5.55
2002	1	0.7523	0.948	4.179	560407	423.092	223.858	21.34	11.29	5.53	16.05	5.29
2002	2	1.05	1	4.196	566286	423.453	224.049	21.82	11.55	5.66	22.91	0
2002	3	1.05	1	5.161	573593	442.186	233.961	23.33	12.35	6.05	24.5	0
2002	4	1.0423	1	5.161	580994	442.186	233.961	23.64	12.51	6.13	24.64	0
2003	1	0.8994	0.991	5.176	588512	446.535	236.262	23.65	12.51	6.13	21.27	2.38
2003	2	1.0097	1	4.997	595864	443.273	234.536	24.04	12.72	6.23	24.27	0
2003	3	1.0322	1	5.176	603574	446.535	236.262	24.8	13.12	6.43	25.59	0
2003	4	1.05	1	5.176	611384	446.535	236.262	25.12	13.29	6.51	26.37	0
2004	1	1.0323	1	5.194	619323	452.079	239.195	25.2	13.33	6.53	26.01	0
2004	2	1.05	1	5.194	627365	452.079	239.195	25.81	13.66	6.69	27.1	0
2004	3	1.05	1	5.194	635511	452.079	239.195	26.43	13.99	6.85	27.75	0
2004	4	0.9815	0.999	5.194	643763	452.079	239.195	26.77	14.17	6.94	26.28	0.5
2005	1	0.626	0.883	5.187	652111	455.679	241.1	26.74	14.15	6.93	16.74	10
2005	2	0.8116	0.97	3.215	657352	412.292	218.144	24.66	13.05	6.39	20.02	4.65
2005	3	0.7523	0.948	4.627	664956	444.923	235.409	27.22	14.4	7.06	20.48	6.74
2005	4	1.0148	1	4.234	671995	436.726	231.072	27	14.29	7	27.4	0
2006	1	1.05	1	5.221	680766	460.345	243.569	28.2	14.92	7.31	29.62	0
2006	2	0.9934	0.999	5.221	689652	460.345	243.569	28.89	15.29	7.49	28.7	0.19
2006	3	0.7641	0.953	5.201	698619	459.971	243.371	29.56	15.64	7.66	22.59	6.97
2006	4	1.0137	1	4.333	706187	442.723	234.245	28.76	15.22	7.46	29.16	0
2007	1	1.0329	1	5.238	715435	465.511	246.302	29.97	15.86	7.77	30.96	0
2007	2	1.05	1	5.238	724804	465.511	246.302	30.7	16.25	7.96	32.24	0
2007	3	1.0495	1	5.238	734295	465.511	246.302	31.45	16.64	8.15	33	0
2007	4	0.9873	0.999	5.238	743911	465.511	246.302	31.86	16.86	8.26	31.45	0.4
2008	1	1.05	1	5.229	753636	468.671	247.974	31.79	16.82	8.24	33.38	0
2008	2	1.05	1	5.249	763526	469.051	248.175	32.59	17.24	8.45	34.22	0
2008	3	1.05	1	5.249	773545	469.051	248.175	33.38	17.66	8.65	35.05	0
2008	4	0.9866	0.999	5.249	783696	469.051	248.175	33.82	17.89	8.77	33.37	0.45
2009	1	1.05	1	5.216	793915	464.67	245.857	33.2	17.57	8.61	34.86	0
2009	2	1.05	1	5.236	804307	465.046	246.056	34.04	18.01	8.82	35.74	0
2009	3	1.05	1	5.236	814835	465.046	246.056	34.86	18.45	9.04	36.61	0
2009	4	1.0291	1	5.236	825501	465.046	246.056	35.32	18.69	9.16	36.35	0
2010	1	1.05	1	5.257	836350	471.653	249.552	35.5	18.78	9.2	37.28	0
2010	2	1.0296	1	5.257	847342	471.653	249.552	36.37	19.24	9.43	37.44	0
2010	3	1.0216	1	5.257	858478	471.653	249.552	37.25	19.71	9.66	38.06	0
2010	4	0.9867	0.999	5.257	869761	471.653	249.552	37.74	19.97	9.78	37.24	0.5
2011	1	0.9904	0.999	5.25	881177	475.39	251.529	37.7	19.95	9.77	37.34	0.36
2011	2	0.9464	0.997	5.25	892742	475.39	251.529	38.62	20.43	10.01	36.55	2.07
2011	3	0.9888	0.999	5.209	904368	474.617	251.12	39.49	20.89	10.24	39.05	0.44
2011	4	1.05	1	5.25	916238	475.39	251.529	40.07	21.2	10.39	42.08	0
2012	1	1.05	1	5.285	928344	480.498	254.232	40.15	21.24	10.41	42.15	0
2012	2	1.0302	1	5.285	940610	480.498	254.232	41.13	21.76	10.66	42.37	0
2012	3	1.05	1	5.285	953038	480.498	254.232	42.13	22.29	10.92	44.24	0
2012	4	1.05	1	5.285	965630	480.498	254.232	42.69	22.59	11.07	44.82	0
2013	1	1.05	1	5.297	978417	484.224	256.203	42.64	22.56	11.05	44.77	0
2013	2	1.05	1	5.297	991374	484.224	256.203	43.68	23.11	11.33	45.87	0
2013	3	0.8662	0.985	5.297	1004502	484.224	256.203	44.75	23.68	11.6	38.76	5.99
2013	4	0.8689	0.985	4.996	1017048	478.325	253.082	44.76	23.68	11.6	38.89	5.87

## Sheet: Outside Basin
Year	Season	Ratio	Current Utility	Population Growth Rate	Population	Total Water Demand per Capita (lit/day)	Domestic Water Demand per Capita (lit/day)	Total Water Demand (MCM)	Domestic Water Demand (MCM)	Non-Domestic Water Demand (MCM)	Total Water Supply (MCM)	Unmet Demand (MCM)
1992	1	1.05	1	5.032	583687	434.7	214.138	22.84	11.25	7.09	23.98	0
1992	2	1.05	1	5.032	591030	434.7	214.138	23.38	11.52	7.26	24.55	0
1992	3	1.0251	1	5.032	598465	434.7	214.138	23.93	11.79	7.43	24.53	0
1992	4	1.05	1	5.032	605994	434.7	214.138	24.24	11.94	7.52	25.45	0
1993	1	1.0006	1	5.059	613658	442.964	218.209	24.46	12.05	7.59	24.48	0
1993	2	1.05	1	5.059	621419	442.964	218.209	25.05	12.34	7.77	26.3	0
1993	3	1.05	1	5.059	629278	442.964	218.209	25.64	12.63	7.96	26.93	0
1993	4	1.0486	1	5.059	637237	442.964	218.209	25.97	12.79	8.06	27.23	0
1994	1	1.05	1	5.084	645336	450.589	221.965	26.17	12.89	8.12	27.48	0
1994	2	1.0244	1	5.084	653538	450.589	221.965	26.8	13.2	8.32	27.45	0
1994	3	1.05	1	5.084	661844	450.589	221.965	27.44	13.52	8.51	28.81	0
1994	4	1.05	1	5.084	670256	450.589	221.965	27.78	13.69	8.62	29.17	0
1995	1	1.05	1	5.111	678820	458.983	226.1	28.04	13.81	8.7	29.44	0
1995	2	1.05	1	5.111	687494	458.983	226.1	28.71	14.15	8.91	30.15	0
1995	3	1.05	1	5.111	696278	458.983	226.1	29.4	14.48	9.12	30.87	0
1995	4	1.05	1	5.111	705175	458.983	226.1	29.78	14.67	9.24	31.27	0
1996	1	1.0059	1	5.138	714233	467.659	230.374	30.06	14.81	9.33	30.24	0
1996	2	1.05	1	5.138	723407	467.659	230.374	30.79	15.17	9.55	32.33	0
1996	3	1.0176	1	5.138	732699	467.659	230.374	31.52	15.53	9.78	32.08	0
1996	4	1.042	1	5.138	742111	467.659	230.374	31.93	15.73	9.91	33.27	0
1997	1	1.05	1	5.156	751677	473.341	233.173	32.02	15.77	9.94	33.62	0
1997	2	1.0489	1	5.156	761366	473.341	233.173	32.8	16.16	10.18	34.4	0
1997	3	1.05	1	5.156	771180	473.341	233.173	33.58	16.54	10.42	35.26	0
1997	4	1.05	1	5.156	781121	473.341	233.173	34.02	16.76	10.56	35.72	0
1998	1	1.05	1	5.116	791112	460.698	226.945	32.8	16.16	10.18	34.44	0
1998	2	1.05	1	5.116	801230	460.698	226.945	33.59	16.55	10.42	35.27	0
1998	3	1.05	1	5.116	811478	460.698	226.945	34.39	16.94	10.67	36.11	0
1998	4	1.0262	1	5.116	821857	460.698	226.945	34.83	17.16	10.81	35.75	0
1999	1	1.05	1	5.13	832397	465.122	229.124	34.84	17.16	10.81	36.59	0
1999	2	1.0201	1	5.13	843072	465.122	229.124	35.68	17.58	11.07	36.4	0
1999	3	0.9261	0.995	5.13	853884	465.122	229.124	36.54	18	11.34	33.84	2.7
1999	4	1.05	1	5.032	864626	463.236	228.195	36.85	18.15	11.44	38.69	0
2000	1	1.0322	1	5.155	875769	472.909	232.96	37.27	18.36	11.57	38.47	0
2000	2	1.0288	1	5.155	887055	472.909	232.96	38.17	18.8	11.85	39.27	0
2000	3	1.05	1	5.155	898487	472.909	232.96	39.09	19.26	12.13	41.05	0
2000	4	1.05	1	5.155	910066	472.909	232.96	39.59	19.5	12.29	41.57	0
2001	1	1.0398	1	5.148	921779	470.877	231.959	39.06	19.24	12.12	40.62	0
2001	2	0.8617	0.984	5.148	933642	470.877	231.959	40.01	19.71	12.42	34.47	5.53
2001	3	0.772	0.956	4.836	944930	464.76	228.946	40.4	19.9	12.54	31.19	9.21
2001	4	0.5896	0.859	4.325	955147	454.012	223.651	39.9	19.65	12.38	23.52	16.37
2002	1	0.6113	0.874	2.864	961986	419.897	206.846	36.35	17.91	11.28	22.22	14.13
2002	2	1.05	1	3.063	969352	425.827	209.767	37.56	18.5	11.66	39.44	0
2002	3	1.05	1	5.161	981859	474.941	233.961	42.9	21.13	13.31	45.05	0
2002	4	1.05	1	5.161	994527	474.941	233.961	43.46	21.41	13.49	45.63	0
2003	1	0.8186	0.972	5.176	1007396	479.612	236.262	43.48	21.42	13.5	35.6	7.89
2003	2	1.0175	1	4.636	1019072	468.695	230.884	43.46	21.41	13.49	44.23	0
2003	3	1.05	1	5.176	1032259	479.612	236.262	45.55	22.44	14.14	47.83	0
2003	4	1.05	1	5.176	1045616	479.612	236.262	46.14	22.73	14.32	48.44	0
2004	1	1.05	1	5.194	1059193	485.566	239.195	46.29	22.8	14.37	48.6	0
2004	2	1.05	1	5.194	1072947	485.566	239.195	47.41	23.35	14.71	49.78	0
2004	3	1.05	1	5.194	1086879	485.566	239.195	48.55	23.92	15.07	50.98	0
2004	4	0.9993	0.999	5.194	1100992	485.566	239.195	49.18	24.23	15.26	49.15	0.03
2005	1	0.4317	0.73	5.187	1115269	489.433	241.1	49.13	24.2	15.25	21.21	27.92
2005	2	0.7161	0.932	1.538	1119557	379.569	186.98	38.67	19.05	12	27.69	10.98
2005	3	0.6001	0.866	3.964	1130652	462.647	227.905	48.12	23.71	14.94	28.88	19.25
2005	4	1.025	1	2.982	1139081	435.91	214.734	45.68	22.5	14.18	46.82	0
2006	1	1.05	1	5.221	1153949	494.445	243.569	51.35	25.3	15.94	53.92	0
2006	2	1.0194	1	5.221	1169011	494.445	243.569	52.6	25.91	16.32	53.62	0
2006	3	0.6073	0.871	5.221	1184270	494.445	243.569	53.87	26.54	16.72	32.72	21.16
2006	4	1.0231	1	3.057	1193321	442.073	217.77	48.53	23.91	15.06	49.65	0
2007	1	1.05	1	5.238	1208948	499.993	246.302	54.4	26.8	16.88	57.12	0
2007	2	1.05	1	5.238	1224779	499.993	246.302	55.73	27.45	17.29	58.51	0
2007	3	1.05	1	5.238	1240817	499.993	246.302	57.08	28.12	17.71	59.93	0
2007	4	0.9992	0.999	5.238	1257065	499.993	246.302	57.82	28.48	17.95	57.78	0.05
2008	1	1.05	1	5.229	1273498	503.387	247.974	57.7	28.42	17.91	60.58	0
2008	2	1.05	1	5.249	1290209	503.795	248.175	59.15	29.14	18.36	62.11	0
2008	3	1.05	1	5.249	1307140	503.795	248.175	60.58	29.84	18.8	63.61	0
2008	4	1.0024	1	5.249	1324293	503.795	248.175	61.38	30.24	19.05	61.53	0
2009	1	1.05	1	5.236	1341628	499.494	246.056	60.31	29.71	18.72	63.33	0
2009	2	1.05	1	5.236	1359190	499.494	246.056	61.78	30.43	19.17	64.87	0
2009	3	1.05	1	5.236	1376982	499.494	246.056	63.28	31.17	19.64	66.44	0
2009	4	1.05	1	5.236	1395007	499.494	246.056	64.11	31.58	19.89	67.31	0
2010	1	1.05	1	5.257	1413341	506.591	249.552	64.44	31.74	20	67.66	0
2010	2	1.0499	1	5.257	1431916	506.591	249.552	66.01	32.52	20.49	69.3	0
2010	3	1.0392	1	5.257	1450735	506.591	249.552	67.61	33.31	20.98	70.26	0
2010	4	1.0111	1	5.257	1469801	506.591	249.552	68.5	33.74	21.26	69.26	0
2011	1	1.0026	1	5.27	1489166	511.018	251.733	68.49	33.74	21.26	68.67	0
2011	2	0.9927	0.999	5.27	1508786	511.018	251.733	70.16	34.56	21.77	69.65	0.51
2011	3	1.0081	1	5.25	1528589	510.604	251.529	71.81	35.37	22.28	72.39	0
2011	4	1.05	1	5.27	1548728	511.018	251.733	72.81	35.87	22.6	76.45	0
2012	1	1.05	1	5.285	1569191	516.091	254.232	72.89	35.9	22.62	76.53	0
2012	2	1.05	1	5.285	1589924	516.091	254.232	74.67	36.78	23.17	78.4	0
2012	3	1.05	1	5.285	1610931	516.091	254.232	76.49	37.68	23.74	80.31	0
2012	4	1.05	1	5.285	1632215	516.091	254.232	77.5	38.18	24.05	81.37	0
2013	1	1.05	1	5.297	1653830	520.092	256.203	77.41	38.13	24.02	81.28	0
2013	2	1.05	1	5.297	1675731	520.092	256.203	79.31	39.07	24.61	83.28	0
2013	3	0.7647	0.953	5.297	1697922	520.092	256.203	81.24	40.02	25.21	62.13	19.12
2013	4	0.7751	0.957	4.396	1716582	500.18	246.394	78.99	38.91	24.51	61.23	17.77

## Sheet: Langat Dam
Year	Season	Start Storage (MCM)	End Storage (MCM)	Inflow (MCM)	Release (MCM)	Overflow (MCM)	Ratio	Utility
1992	1	33.79	23.25	8.96	19.5	0	0.5588	0.979
1992	2	23.25	22.77	11.27	11.75	0	0.5473	0.986
1992	3	22.77	20.95	6.55	8.37	0	0.5036	0.989
1992	4	20.95	22.97	9.97	7.95	0	0.5522	0.981
1993	1	22.97	20.21	6.04	8.8	0	0.4859	0.99
1993	2	20.21	22.93	10.04	7.33	0	0.5511	0.985
1993	3	22.93	23.23	10.57	10.26	0	0.5585	0.983
1993	4	23.23	21.57	18.71	20.38	0	0.5184	0.991
1994	1	21.57	22.56	11.68	10.69	0	0.5422	0.987
1994	2	22.56	20.85	12.3	14	0	0.5013	0.993
1994	3	20.85	22.7	10.01	8.16	0	0.5457	0.986
1994	4	22.7	23.24	11.16	10.62	0	0.5586	0.983
1995	1	23.24	21.91	7.94	9.26	0	0.5268	0.986
1995	2	21.91	21.69	15.08	15.3	0	0.5215	0.991
1995	3	21.69	23.23	10.68	9.14	0	0.5585	0.983
1995	4	23.23	22.83	11.62	12.02	0	0.5489	0.985
1996	1	22.83	20.33	6.17	8.67	0	0.4888	0.99
1996	2	20.33	22.16	8.97	7.14	0	0.5328	0.985
1996	3	22.16	20.6	13.58	15.15	0	0.4951	0.993
1996	4	20.6	21.15	15.24	14.69	0	0.5084	0.992
1997	1	21.15	23.23	10.95	8.87	0	0.5584	0.983
1997	2	23.23	26.57	20.58	17.24	0	0.6386	0.996
1997	3	26.57	24.41	18.93	21.08	0	0.5868	0.972
1997	4	24.41	21.67	13.7	16.44	0	0.521	0.991
1998	1	21.67	22.34	9.03	8.37	0	0.5369	0.984
1998	2	22.34	22.02	15.39	15.71	0	0.5293	0.989
1998	3	22.02	21.55	15.31	15.78	0	0.518	0.991
1998	4	21.55	20.74	7.76	8.57	0	0.4985	0.989
1999	1	20.74	23.28	11.59	9.05	0	0.5595	0.982
1999	2	23.28	20.6	14.78	17.45	0	0.4952	0.993
1999	3	20.6	18.75	6.52	8.37	0	0.4508	0.987
1999	4	18.75	23.14	12.75	8.36	0	0.5563	0.983
2000	1	23.14	20.82	14.35	16.67	0	0.5005	0.993
2000	2	20.82	20.74	14.12	14.2	0	0.4986	0.993
2000	3	20.74	22.64	10.8	8.9	0	0.5443	0.986
2000	4	22.64	24.5	19.01	17.15	0	0.589	0.971
2001	1	24.5	20.93	13.77	17.34	0	0.5032	0.993
2001	2	20.93	17.75	5.59	8.77	0	0.4267	0.983
2001	3	17.75	16.29	5.5	6.96	0	0.3915	0.972
2001	4	16.29	13.42	3.81	6.67	0	0.3227	0.932
2002	1	13.42	13.32	4.36	4.46	0	0.3203	0.93
2002	2	13.32	23.27	13.07	3.13	0	0.5593	0.982
2002	3	23.27	22.46	9.91	10.72	0	0.5398	0.984
2002	4	22.46	21.49	16.3	17.26	0	0.5167	0.991
2003	1	21.49	17.25	5.25	9.49	0	0.4147	0.98
2003	2	17.25	20.48	8.83	5.6	0	0.4924	0.99
2003	3	20.48	21.13	8.88	8.24	0	0.5079	0.989
2003	4	21.13	22.2	14.4	13.33	0	0.5337	0.989
2004	1	22.2	21.12	15.84	16.92	0	0.5078	0.992
2004	2	21.12	22.51	16.99	15.6	0	0.5411	0.987
2004	3	22.51	23.16	12.59	11.94	0	0.5568	0.983
2004	4	23.16	24.98	23.86	22.04	0	0.6006	0.997
2005	1	24.98	12.09	1.96	14.86	0	0.2906	0.904
2005	2	12.09	15.23	5.28	2.14	0	0.3662	0.96
2005	3	15.23	14.41	4.55	5.37	0	0.3465	0.949
2005	4	14.41	20.59	15.08	8.91	0	0.4949	0.993
2006	1	20.59	22.83	13.24	11	0	0.5487	0.985
2006	2	22.83	25.04	24	21.78	0	0.602	0.997
2006	3	25.04	14.99	4.03	14.08	0	0.3603	0.957
2006	4	14.99	20.54	9.72	4.17	0	0.4937	0.99
2007	1	20.54	20.98	9.5	9.05	0	0.5044	0.989
2007	2	20.98	22.13	10.63	9.49	0	0.5319	0.989
2007	3	22.13	21.33	9.88	10.67	0	0.5128	0.988
2007	4	21.33	24.98	20.28	16.63	0	0.6006	0.997
2008	1	24.98	23.12	11.75	13.61	0	0.5558	0.983
2008	2	23.12	22.06	17.73	18.79	0	0.5302	0.989
2008	3	22.06	21.52	9.85	10.39	0	0.5172	0.988
2008	4	21.52	24.98	22.41	18.94	0	0.6006	0.997
2009	1	24.98	23.26	14.19	15.91	0	0.5592	0.982
2009	2	23.26	29.79	20.28	13.75	0	0.7162	0.975
2009	3	29.79	22.29	10.93	18.43	0	0.5359	0.988
2009	4	22.29	20.79	16.87	18.37	0	0.4998	0.993
2010	1	20.79	23.08	13.53	11.24	0	0.5548	0.984
2010	2	23.08	20.78	15.74	18.04	0	0.4996	0.993
2010	3	20.78	20.61	16.67	16.84	0	0.4955	0.993
2010	4	20.61	24.98	24.23	19.86	0	0.6005	0.997
2011	1	24.98	24.98	19.02	19.02	0	0.6006	0.966
2011	2	24.98	37.71	28.86	16.14	0	0.9064	0.764
2011	3	37.71	24.98	19.35	32.08	0	0.6005	0.966
2011	4	24.98	22.08	18.39	21.29	0	0.5308	0.989
2012	1	22.08	22.08	19.42	19.42	0	0.5308	0.989
2012	2	22.08	20.73	17.67	19.03	0	0.4982	0.993
2012	3	20.73	21.87	12.24	11.1	0	0.5257	0.99
2012	4	21.87	41.6	30.74	2.39	8.62	1	0.507
2013	1	41.6	23.43	17.94	36.11	0	0.5632	0.981
2013	2	23.43	21.91	18.05	19.57	0	0.5267	0.99
2013	3	21.91	18.07	7.57	11.41	0	0.4343	0.985
2013	4	18.07	18.11	8.82	8.78	0	0.4353	0.985

## Sheet: Semenyih Dam
Year	Season	Start Storage (MCM)	End Storage (MCM)	Inflow (MCM)	Release (MCM)	Overflow (MCM)	Ratio	Utility
1992	1	59.22	41.3	10.45	28.37	0	0.5846	0.965
1992	2	41.3	41.71	13.39	12.98	0	0.5904	0.971
1992	3	41.71	35.11	7.8	14.41	0	0.4969	0.992
1992	4	35.11	40.62	11.89	6.37	0	0.575	0.97
1993	1	40.62	32.92	7.51	15.21	0	0.466	0.994
1993	2	32.92	40.42	11.22	3.72	0	0.5721	0.971
1993	3	40.42	42.84	13.49	11.07	0	0.6063	0.964
1993	4	42.84	38.62	22.95	27.17	0	0.5466	0.985
1994	1	38.62	41.18	14.05	11.49	0	0.5829	0.974
1994	2	41.18	36.65	15.92	20.45	0	0.5188	0.989
1994	3	36.65	39.85	11.14	7.94	0	0.5641	0.975
1994	4	39.85	42.84	14.18	11.19	0	0.6064	0.963
1995	1	42.84	37.86	9.15	14.13	0	0.5359	0.984
1995	2	37.86	38.96	18.34	17.24	0	0.5514	0.984
1995	3	38.96	42.84	13.22	9.34	0	0.6063	0.964
1995	4	42.84	41.88	14.13	15.08	0	0.5928	0.97
1996	1	41.88	33.29	7.77	16.36	0	0.4712	0.994
1996	2	33.29	38.54	11.11	5.86	0	0.5455	0.981
1996	3	38.54	35.93	16.11	18.72	0	0.5086	0.99
1996	4	35.93	37.48	17.75	16.2	0	0.5305	0.988
1997	1	37.48	42.83	12.54	7.19	0	0.6062	0.964
1997	2	42.83	37.88	22.86	27.81	0	0.5361	0.987
1997	3	37.88	45.48	22.16	14.56	0	0.6437	0.941
1997	4	45.48	38.91	15.56	22.13	0	0.5507	0.984
1998	1	38.91	38.99	10.76	10.68	0	0.5519	0.979
1998	2	38.99	39.81	18.6	17.78	0	0.5635	0.98
1998	3	39.81	38.57	18.94	20.18	0	0.5459	0.985
1998	4	38.57	34.48	9.45	13.53	0	0.4881	0.993
1999	1	34.48	42.93	13.71	5.26	0	0.6077	0.963
1999	2	42.93	35.94	16.82	23.81	0	0.5087	0.99
1999	3	35.94	28.66	7.52	14.8	0	0.4057	0.987
1999	4	28.66	42.62	14.53	0.58	0	0.6032	0.965
2000	1	42.62	36.56	17.13	23.18	0	0.5175	0.989
2000	2	36.56	36.34	16.67	16.9	0	0.5143	0.99
2000	3	36.34	41.4	12.92	7.85	0	0.586	0.973
2000	4	41.4	45.67	22.66	18.39	0	0.6464	0.939
2001	1	45.67	36.88	17.03	25.82	0	0.522	0.989
2001	2	36.88	25.99	6.68	17.57	0	0.3679	0.975
2001	3	25.99	22.52	6.57	10.05	0	0.3187	0.949
2001	4	22.52	16.75	4.58	10.35	0	0.2371	0.873
2002	1	16.75	16.56	5.22	5.41	0	0.2344	0.87
2002	2	16.56	42.91	15.25	0	0	0.6074	0.963
2002	3	42.91	39.31	11.61	15.21	0	0.5564	0.978
2002	4	39.31	38.42	19.46	20.35	0	0.5438	0.985
2003	1	38.42	24.76	6.27	19.93	0	0.3504	0.967
2003	2	24.76	33.74	11.4	2.42	0	0.4775	0.994
2003	3	33.74	35.63	11.01	9.12	0	0.5043	0.991
2003	4	35.63	40.29	16.79	12.13	0	0.5703	0.978
2004	1	40.29	37.41	19.47	22.35	0	0.5295	0.988
2004	2	37.41	41.07	21.18	17.52	0	0.5813	0.974
2004	3	41.07	42.67	15.19	13.59	0	0.6039	0.965
2004	4	42.67	42.43	28.67	28.91	0	0.6005	0
2005	1	42.43	14.36	2.22	30.29	0	0.2032	0.827
2005	2	14.36	20.26	6.8	0.89	0	0.2868	0.925
2005	3	20.26	18.63	5.48	7.11	0	0.2637	0.903
2005	4	18.63	35.91	19.38	2.1	0	0.5083	0.99
2006	1	35.91	41.85	15.88	9.94	0	0.5924	0.97
2006	2	41.85	42.5	29.76	29.11	0	0.6016	0
2006	3	42.5	19.76	4.76	27.5	0	0.2797	0.919
2006	4	19.76	35.76	12.22	0	0	0.5062	0.99
2007	1	35.76	35.21	11.16	11.71	0	0.4984	0.992
2007	2	35.21	40.1	12.43	7.54	0	0.5676	0.979
2007	3	40.1	36.22	11.68	15.56	0	0.5127	0.99
2007	4	36.22	42.43	25.96	19.76	0	0.6005	0
2008	1	42.43	42.57	14.41	14.27	0	0.6025	0.965
2008	2	42.57	39.91	21.79	24.45	0	0.5649	0.98
2008	3	39.91	38.52	12.15	13.54	0	0.5452	0.985
2008	4	38.52	42.43	24.57	20.66	0	0.6005	0
2009	1	42.43	42.9	15.6	15.13	0	0.6072	0.963
2009	2	42.9	45.63	23.88	21.15	0	0.6458	0.94
2009	3	45.63	40.52	14.09	19.19	0	0.5736	0.977
2009	4	40.52	36.48	20.5	24.54	0	0.5164	0.989
2010	1	36.48	42.47	15.89	9.91	0	0.6011	0.966
2010	2	42.47	36.46	19.76	25.77	0	0.516	0.989
2010	3	36.46	35.98	20.08	20.55	0	0.5093	0.99
2010	4	35.98	42.42	29.13	22.69	0	0.6004	0
2011	1	42.42	42.43	24.45	24.44	0	0.6005	0
2011	2	42.43	66.53	34.15	10.04	0	0.9417	0
2011	3	66.53	42.42	24.65	48.76	0	0.6004	0
2011	4	42.42	39.98	21.7	24.14	0	0.5659	0.98
2012	1	39.98	39.99	21.85	21.84	0	0.566	0.98
2012	2	39.99	36.29	22.3	25.99	0	0.5137	0.99
2012	3	36.29	39.42	14.89	11.76	0	0.558	0.982
2012	4	39.42	70.65	37.67	2.39	4.05	1	0
2013	1	70.65	43.29	21.11	48.47	0	0.6127	0.96
2013	2	43.29	39.53	22.8	26.56	0	0.5595	0.981
2013	3	39.53	26.8	9.24	21.96	0	0.3794	0.979
2013	4	26.8	26.92	9.91	9.8	0	0.381	0.98

## Sheet: Performance
Occurrence Reliability								Overall Performance
Unit	Season 1	Season 2	Season 3	Season 4				Unit	Occurrence Reliability	Volumetric Reliability	Resilience	Vulnerability
Inside Basin	81.8	81.8	72.7	72.7				Inside Basin	86.4	97.5	50	9.993
Outside Basin	86.4	86.4	77.3	81.8				Outside Basin	86.4	96	50	28.672
Environment Langat	90.9	100	100	95.5				Environment Langat	96.6	99.7	66.7	3.815
Environment Semenyih	90.9	95.5	90.9	95.5				Environment Semenyih	93.2	98.7	50	14.367
Langat Dam	100	100	100	95.5				Langat Dam	98.9	0.004	100	8.62
Environment Langat	100	100	100	95.5				Semenyih Dam	98.9	0.001	100	4.05
Volumetric Reliability
Unit	Season 1	Season 2	Season 3	Season 4
Inside Basin	96.7	98.5	96.4	98
Outside Basin	94.8	98	94	97.1
Environment Langat	98.9	100	100	99.7
Environment Semenyih	97.2	99.8	98.9	98.9
Langat Dam	0	0	0	0.017
Semenyih Dam	0	0	0	0.005
